# Supplementary material for: Conifer R2R3-MYB transcription factors: sequence analyses and gene expression in wood-forming tissues of white spruce (Picea glauca)
Source: PubMed Central journal article supplement (PMC1851958; doi:10.1186/1471-2229-7-17), 2007-03-30
Supplement: 1471-2229-7-17-S1.pdf [file 1471-2229-7-17-S1.pdf]

| MYB genes names | Forward primer sequences | Tm Salt Adjusted (°C) | Reverse primer sequences | Tm Salt Adjusted (°C) | Amplified gDNA length (pb) |
|-----------------|--------------------------|-----------------------|--------------------------|-----------------------|----------------------------|
| <i>PgMYB1</i>   | TTTAGAACGATCCCCGAATG     | 56                    | ATCTCATCCTCCTCCTCCAT     | 58                    | 1336                       |
| <i>PgMYB2</i>   | CAATGGGACGCCACTTATG      | 57                    | CTACCCTGTGAAAGACGAAGG    | 61                    | 1898                       |
| <i>PgMYB3</i>   | TTTTGAAATTGCGAACAGAATG   | 55                    | TATTTTTAGGCACCCGTTGATT   | 56                    | 2430                       |
| <i>PgMYB4</i>   | GCACGGCCATTCTATTCATT     | 56                    | CACCTGATCAAGGATCGACA     | 58                    | 1503                       |
| <i>PgMYB5</i>   | CCCTTGCAGCTAAGTTGCTT     | 58                    | TATGAATGCTTCGTGGTGGA     | 56                    | 1243                       |
| <i>PgMYB6</i>   | CTAATGGCGTCGATGAAAGG     | 58                    | GCAACCCCTGAACTCTGTGT     | 60                    | 1007                       |
| <i>PgMYB7</i>   | TGCAGAGGCTTGTTCAGAAATA   | 58                    | TTTTATTGGAAGGGCTGAGTGT   | 58                    | 1220                       |
| <i>PgMYB8</i>   | TCGATCAGAGTACGGGGATT     | 58                    | GGCTGCGAGTTTGTGTGAAT     | 58                    | 1963                       |
| <i>PgMYB9</i>   | TTCGATCCTGTTGTGAGCTG     | 58                    | CCAAGTGCCCCTTTATTTCA     | 56                    | 1370                       |
| <i>PgMYB10</i>  | CTTGGTCACGGTTTCCAATC     | 58                    | CCCATGGGATAACACACTCC     | 60                    | 1022                       |
| <i>PgMYB11</i>  | TTGCATTGTAGAGGGCCAAT     | 56                    | TCCATTCCATTTCGATCTGTTC   | 57                    | 2356                       |
| <i>PgMYB12</i>  | TCAGAAGAACAGGGCACCA      | 57                    | ATAAGGGCAATGGCTGGACT     | 58                    | 1507                       |
| <i>PgMYB13</i>  | ACCTTGCACGGTCATTCTTC     | 58                    | ACACGACTTCGGGCAATTTA     | 56                    | 938                        |

**Additional file 1 – Primers sequences of spruce *MYBs* used for genomic amplification and sequencing.**
